# Supplementary material
Source: publisher site journal article supplement (https://thieme-connect.com/media/10.1055-s-00035024/201605/supmat/10-1160-th16-03-0185-supp.pdf)

**Supplementary material to Ambrosino et al. “The risk of venous thromboembolism in patients with hepatitis C. A systematic review and meta-analysis” (Thromb Haemost 2016; 116.4)**

|                 |                                                                                                                                                                                                                               |
|-----------------|-------------------------------------------------------------------------------------------------------------------------------------------------------------------------------------------------------------------------------|
| Suppl. Table 1  | Transient risk factors for venous thromboembolism (VTE) in hepatitis C virus-infected subjects and uninfected controls in included studies.                                                                                   |
| Suppl. Figure 1 | PRISMA flow diagram.                                                                                                                                                                                                          |
| Suppl. Figure 2 | Sensitivity analysis. Risk of venous thromboembolism (VTE) in hepatitis C virus-infected subjects and uninfected controls: analysis of adjusted risk estimates.                                                               |
| Suppl. Figure 3 | Sensitivity analysis. Risk of venous thromboembolism (VTE) in hepatitis C virus-infected subjects and uninfected controls: exclusion of studies specifically enrolling populations exposed to transient risk factors for VTE. |
| Suppl. Figure 4 | Sensitivity analysis. Risk of venous thromboembolism (VTE) in hepatitis C virus-infected subjects and uninfected controls: analysis of cohort studies.                                                                        |
| Suppl. Figure 5 | Funnel plots of effect size versus standard error for studies evaluating venous thromboembolism (VTE) in patients with HCV-infection and uninfected controls.                                                                 |

**Suppl. Table 1. Transient risk factors for venous thromboembolism (VTE) in hepatitis C virus-infected subjects and uninfected controls in included studies.**

| Study                |          | Pts (n) | Malignancy (%) | Pregnancy (%) | Hormonal therapy (%) | Orthopedic trauma/surgery (%) | Drug addiction (%) |
|----------------------|----------|---------|----------------|---------------|----------------------|-------------------------------|--------------------|
| Ahmed 2012           | HCV      | 47391   | -              | -             | -                    | -                             | -                  |
|                      | Controls | 50291   | -              | -             | -                    | -                             | -                  |
| Best 2010            | HCV      | 26444   | -              | -             | -                    | 100                           | -                  |
|                      | Controls | 8336822 | -              | -             | -                    | 100                           | -                  |
| El Bokl 2014         | HCV      | 51      | 0              | 0             | 0                    | -                             | -                  |
|                      | Controls | 51      | 0              | 0             | 0                    | -                             | -                  |
| Enger 2014           | HCV      | 21919   | -              | -             | -                    | -                             | -                  |
|                      | Controls | 67109   | -              | -             | -                    | -                             | -                  |
| RostamiJalilian 2006 | HCV      | 59      | -              | -             | -                    | -                             | 100                |
|                      | Controls | 70      | -              | -             | -                    | -                             | 100                |
| Wang 2015            | HCV      | 3686    | 2.4            | 5.9           | 19.3                 | 2.3                           | -                  |
|                      | Controls | 14744   | 3.9            | 6.9           | 23.3                 | 3.2                           | -                  |

**HCV: hepatitis C virus.**

Suppl. Figure 1. Prisma Flow Diagram.

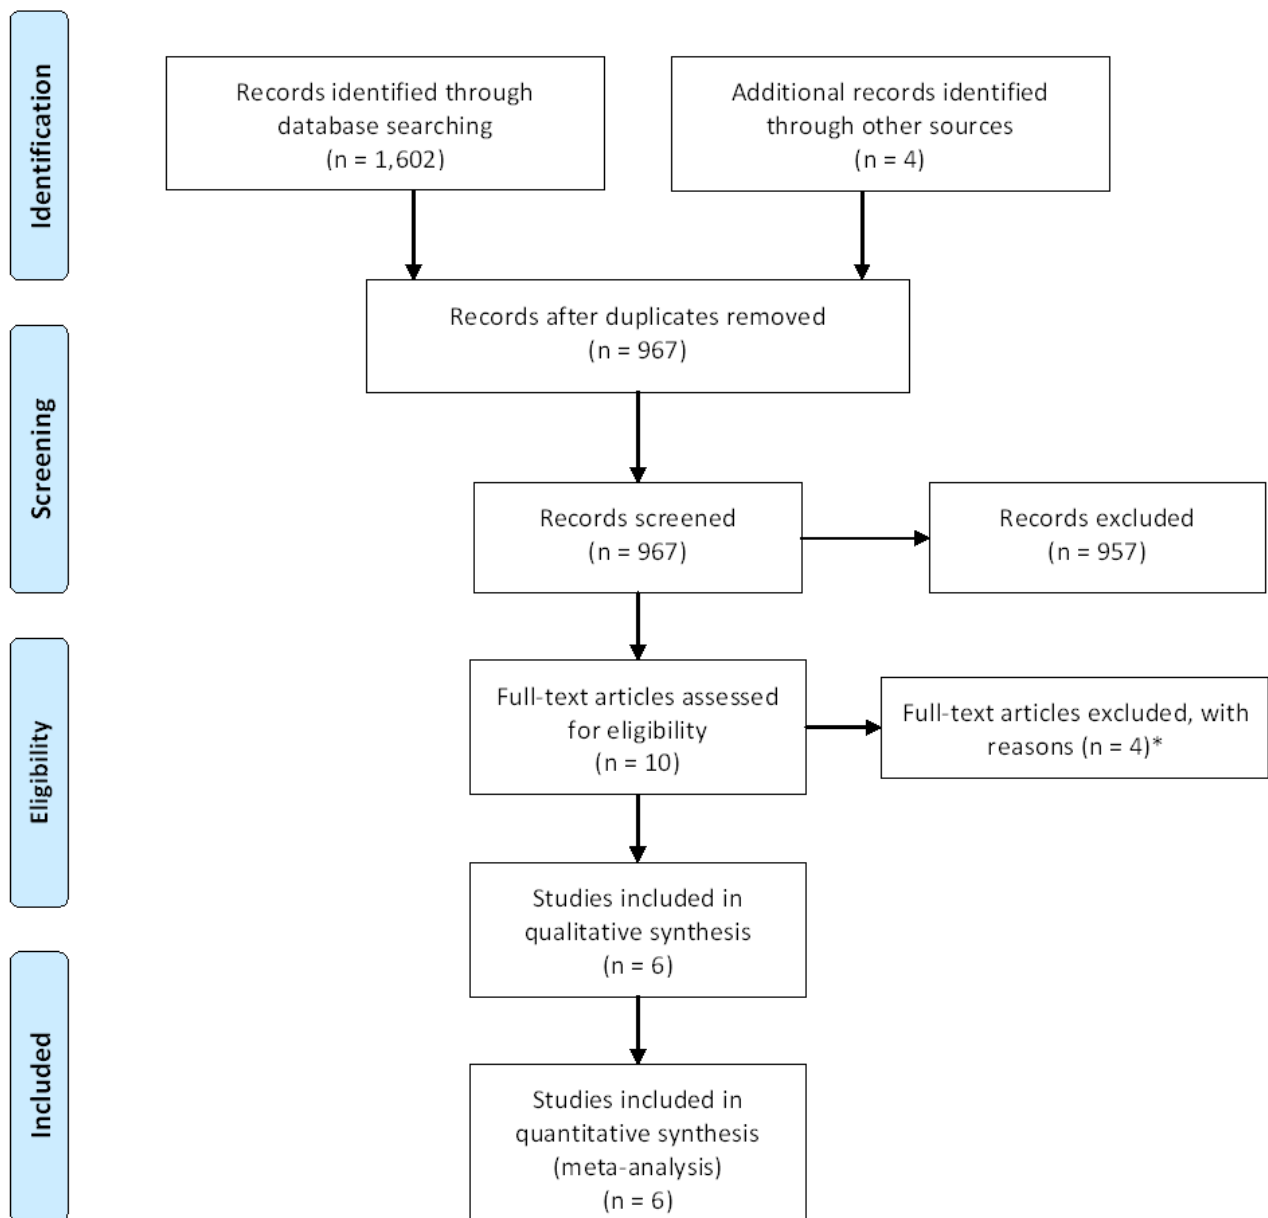

\* 3 studies on cirrhosis, 1 study without control group.

**Suppl. Figure 2. Sensitivity analysis. Risk of venous thromboembolism (VTE) in hepatitis C virus-infected subjects and uninfected controls: analysis of adjusted risk estimates.**

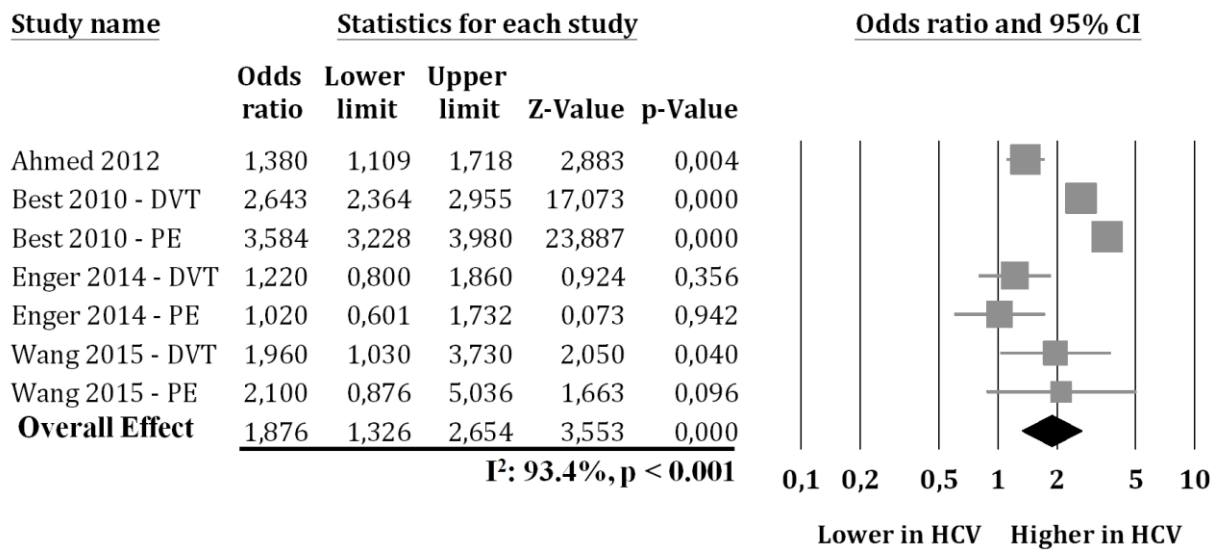

95% CI: 95% confidence interval; HCV: hepatitis C virus; DVT: deep venous thrombosis; PE: pulmonary embolism.

**Suppl. Figure 3. Sensitivity analysis. Risk of venous thromboembolism (VTE) in hepatitis C virus-infected subjects and uninfected controls: exclusion of studies specifically enrolling populations exposed to transient risk factors for VTE.**

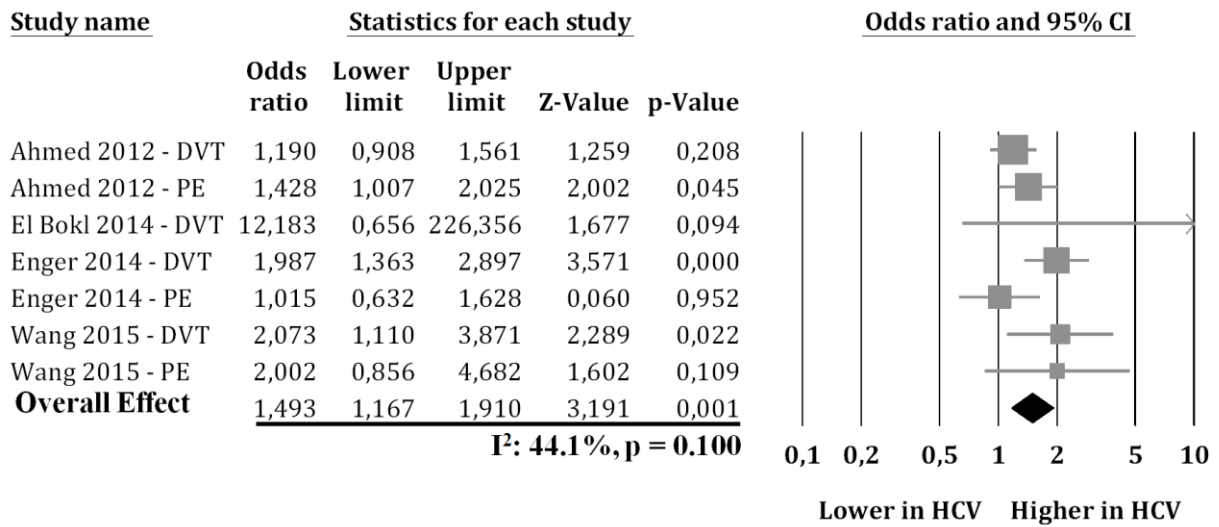

95% CI: 95% confidence interval; HCV: hepatitis C virus; DVT: deep venous thrombosis; PE: pulmonary embolism.

**Suppl. Figure 4. Sensitivity analysis. Risk of venous thromboembolism (VTE) in hepatitis C virus-infected subjects and uninfected controls: analysis of studies with a retrospective design.**

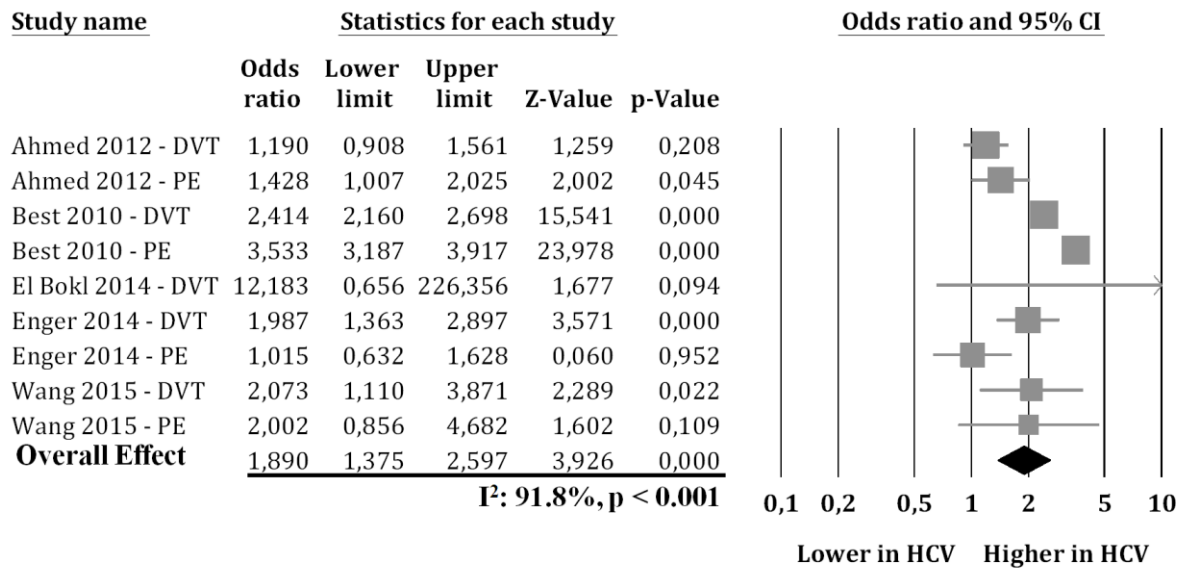

95% confidence interval; HCV: hepatitis C virus; DVT: deep venous thrombosis; PE: pulmonary embolism.

Suppl. Figure 5. Funnel plots of effect size versus standard error for studies evaluating venous thromboembolism (VTE) in patients with HCV-infection and uninfected controls.

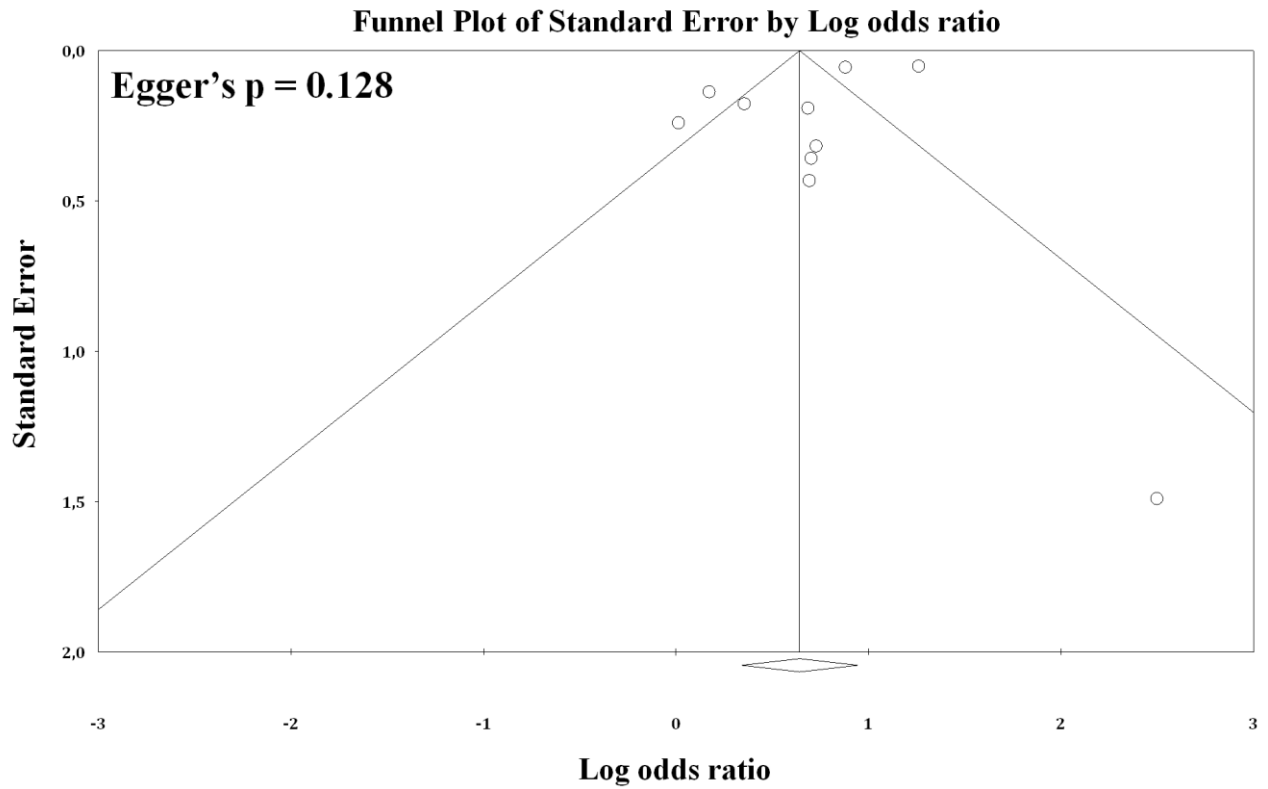

Supplement: Supplementary file 1 [file 10-1160-th16-03-0185-supp.pdf]
